# Supplementary material for: A theoretical study of adsorbed non-metallic atoms on magnesium chloride monolayers
Source: Royal Society of Chemistry journal article supplement (doi:10.1039/c9nj01762c), 2019-01-01
Supplement: c9nj01762c1.pdf [file c9nj01762c1.pdf]

# Electronic and Structural Properties of Adsorbed Non-Metallic Atoms on Magnesium Chloride Monolayers

*Igo T. Lima,<sup>1</sup> Ricardo Gargano,<sup>2</sup> Silvete Guerini,<sup>3</sup> and Edson N. C. Paura.<sup>4,\*</sup>*

<sup>1</sup> Federal University of Maranhão, 65080-805, São Luis, MA, Brazil.

<sup>2</sup> Institute of Physics, University of Brasilia, Campus Darcy Ribeiro, Brasilia, Brazil.

<sup>3</sup> Department of Physics, Federal University of Maranhão, 65080-805, São Luis, MA, Brazil.

<sup>4</sup> Federal University of Maranhão, 65800-000, Balsas, MA, Brazil.

## List of Figures & Tables

Figure S1. Optimized atomic structures of the planes formed by doped  $\text{MgCl}_2$  monolayer with boron atoms ( $\text{B}_{\text{S1}}$  configuration), with nitrogen atoms ( $\text{N}_{\text{S1}}$  configuration), and carbon atoms ( $\text{C}_{\text{S2}}$  configuration).....S3

Figure S2. Density of deformed charge of the  $\text{MgCl}_2$  monolayers doped with boron atoms ( $\text{B}_{\text{S1}}$  configuration), with nitrogen atoms ( $\text{N}_{\text{S1}}$  configuration), and carbon atoms ( $\text{C}_{\text{S2}}$  configurations). The dark green, light green, pink, blue and gray spheres represent the Mo, Cl, B, N and C atoms, respectively.....S4

Figure S3. Structure of bands of  $\text{MgCl}_2$  monolayer doped with nitrogen atoms in the  $\text{B}_{\text{S1}}$  configuration. The red dash line represents the Fermi level.....S5

Figure S4. Total Density of States and Projected State Density only for of the dopant atoms present in the monolayer: boron atom ( $\text{B}_{\text{I1}}$ ), nitrogen atoms ( $\text{N}_{\text{I1}}$  and  $\text{N}_{\text{I2}}$ ) and carbon atoms ( $\text{C}_{\text{I1}}$ ,  $\text{C}_{\text{I2}}$  and  $\text{C}_{\text{S1}}$ ). The vertical dashed line represents the Fermi level.....S6

Figure S5. Total Density of States and Projected State Density only for the magnesium atoms present in the monolayer in the different configurations studied. The vertical dashed line represents the Fermi level.....S7

Figure S6. Extracted fragments from the doped monolayer with nitrogen atoms representing the tetrahedral configuration (left) and the octahedral configuration (right). The doped monolayer with carbon atoms presents similar configurations and the doped monolayer with boron atoms only presents octahedral configuration.....S8

Figure S7. Structure of bands of  $\text{MgCl}_2$  monolayer doped with nitrogen atoms in the  $\text{N}_{\text{S1}}$  configuration. The red dash line represents the Fermi level.....S9

Figure S8. Structure of bands of  $\text{MgCl}_2$  monolayer doped with carbon atoms in the  $\text{C}_{\text{S2}}$  configuration. The red dash line represents the Fermi level.....S9

Figure S9. Total Density of States and Projected State Density of  $\text{MgCl}_2$  monolayer doped with nitrogen atoms in the  $\text{B}_{\text{S1}}$  configuration. The vertical dashed line represents the Fermi level.....S10

Figure S10. Total Density of States and Projected State Density of  $\text{MgCl}_2$  monolayer doped with nitrogen atoms in the  $\text{N}_{\text{S1}}$  configuration. The vertical dashed line represents the Fermi level.....S11

Figure S11. Total Density of States and Projected State Density of  $\text{MgCl}_2$  monolayer doped with carbon atoms in the  $\text{C}_{\text{S2}}$  configuration. The vertical dashed line represents the Fermi level.....S11

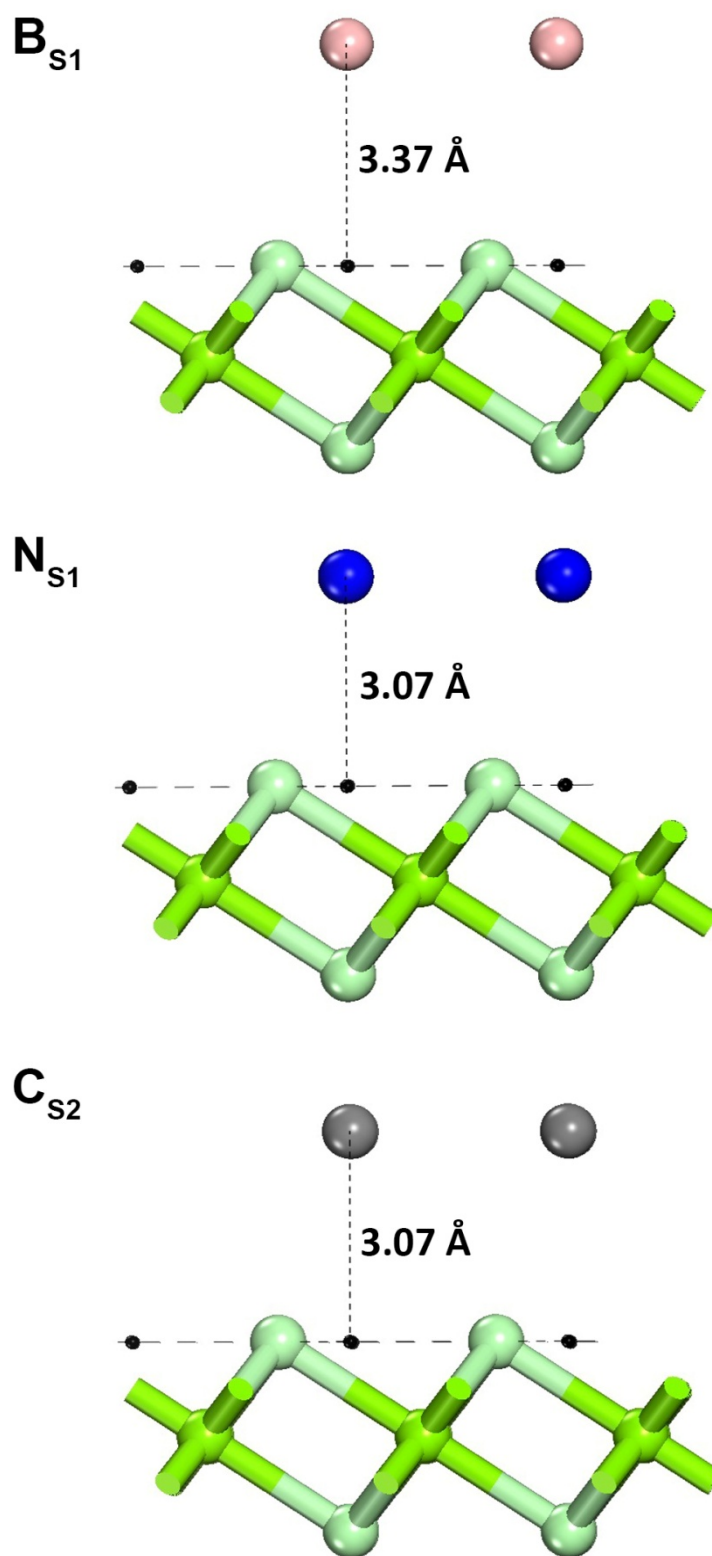

**Figure S1.** Optimized atomic structures of the planes formed by doped MgCl<sub>2</sub> monolayer with boron atoms (B<sub>S1</sub> configuration), with nitrogen atoms (N<sub>S1</sub> configuration), and carbon atoms (C<sub>S2</sub> configuration).

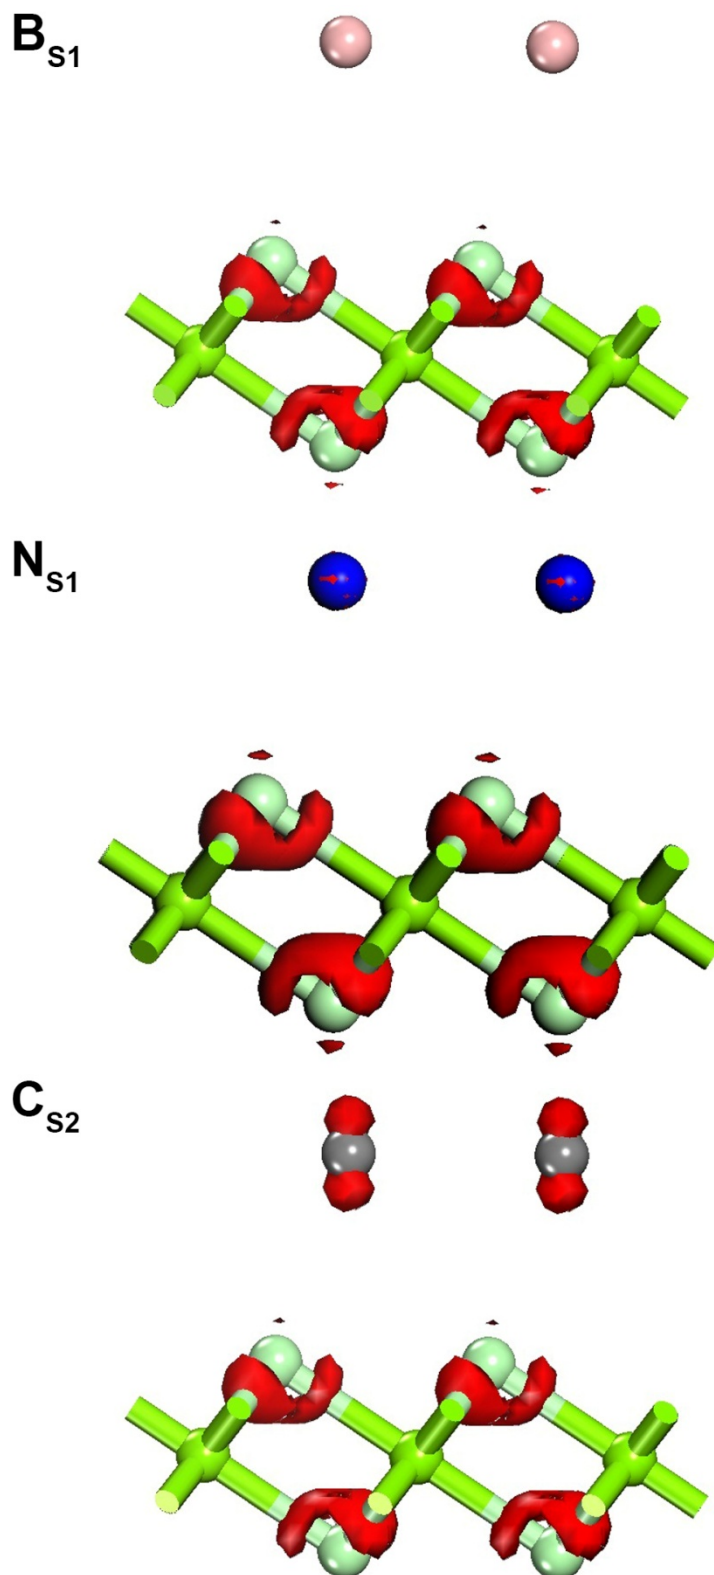

Figure S2. Density of deformed charge of the MgCl<sub>2</sub> monolayers doped with boron atoms ( $B_{S1}$  configuration), with nitrogen atoms ( $N_{S1}$  configuration), and carbon atoms ( $C_{S2}$  configurations). The dark green, light green, pink, blue and gray spheres represent the Mo, Cl, B, N and C atoms, respectively.

**Tetrahedral**

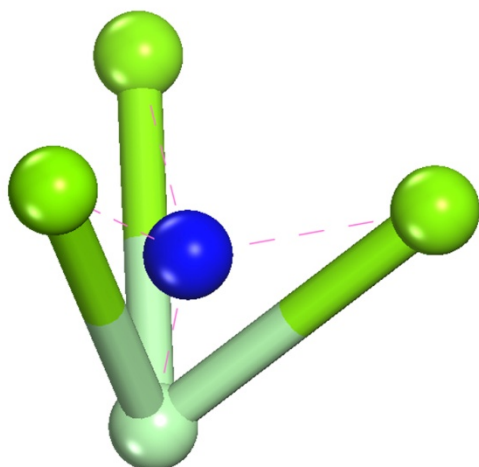

**Octahedral**

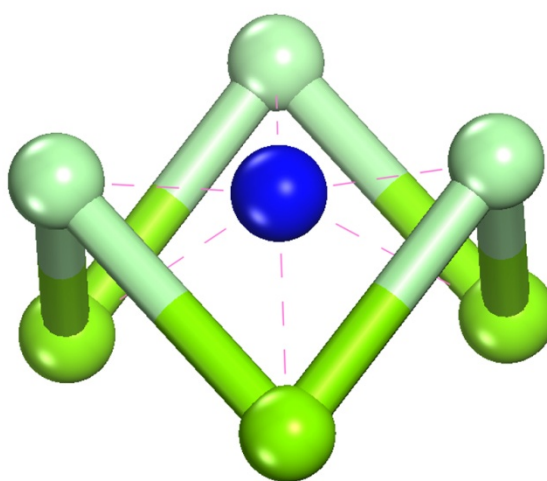

**Figure S3. Extracted fragments from the doped monolayer with nitrogen atoms representing the tetrahedral configuration (left) and the octahedral configuration (right). The doped monolayer with carbon atoms presents similar configurations and the doped monolayer with boron atoms only presents octahedral configuration.**

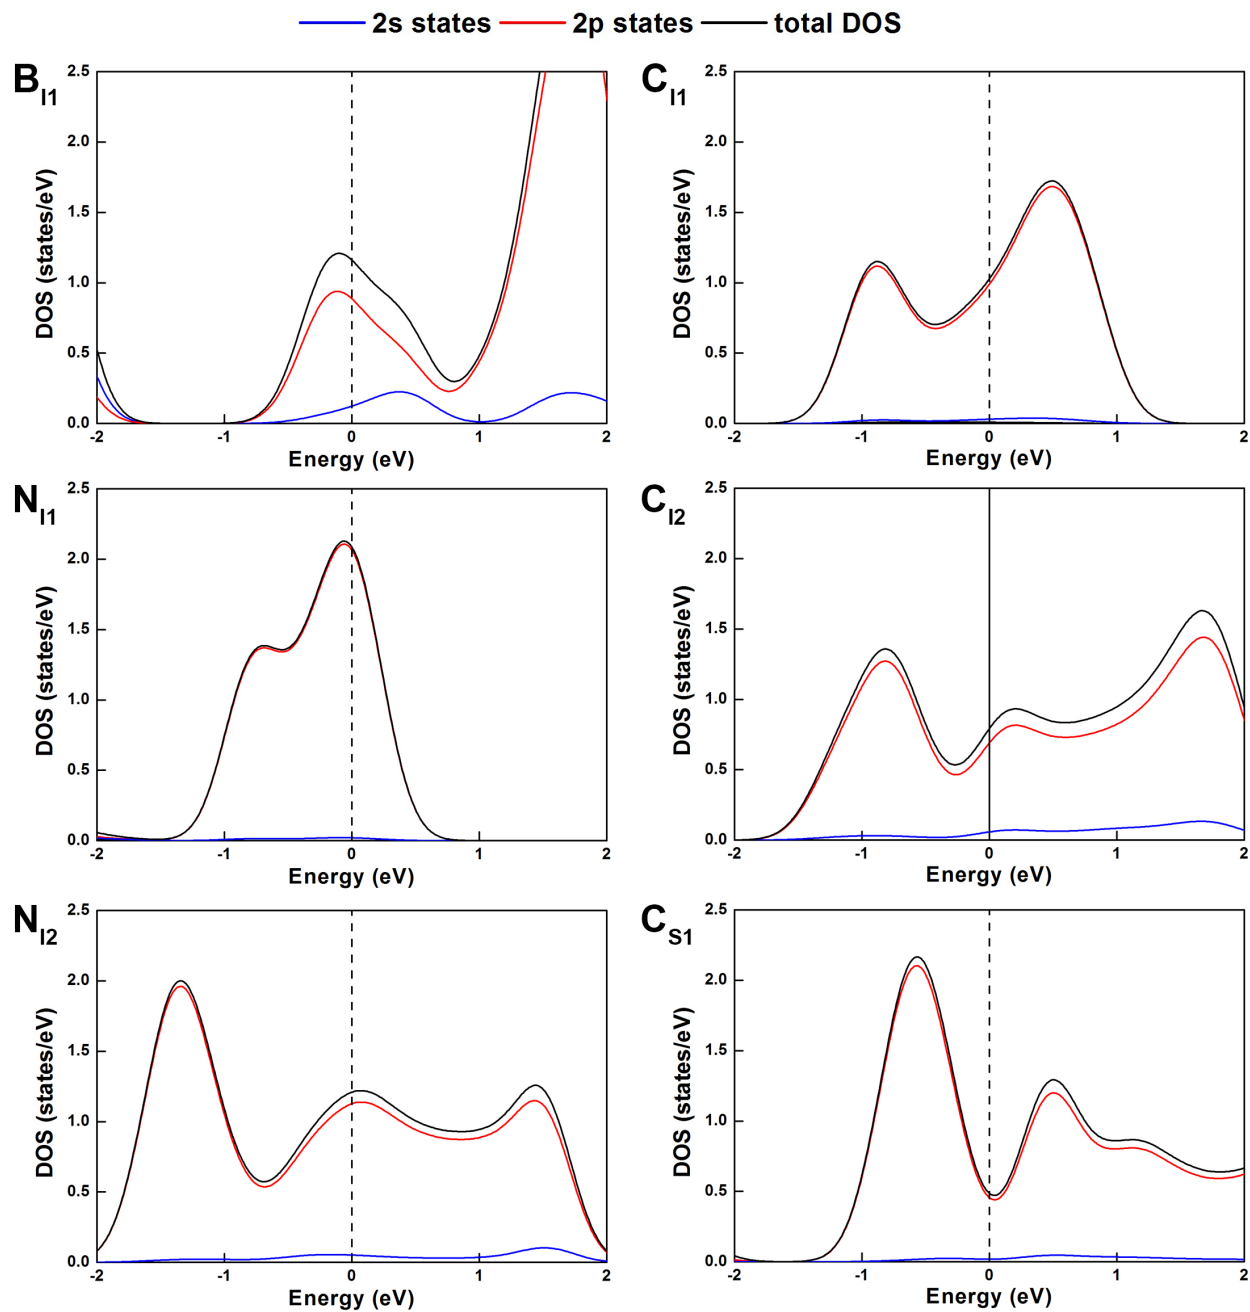

**Figure S4: Total Density of States and Projected State Density only for of the dopant atoms present in the monolayer: boron atom (B<sub>I1</sub>), nitrogen atoms (N<sub>I1</sub> and N<sub>I2</sub>) and carbon atoms (C<sub>I1</sub>, C<sub>I2</sub> and C<sub>S1</sub>). The vertical dashed line represents the Fermi level.**

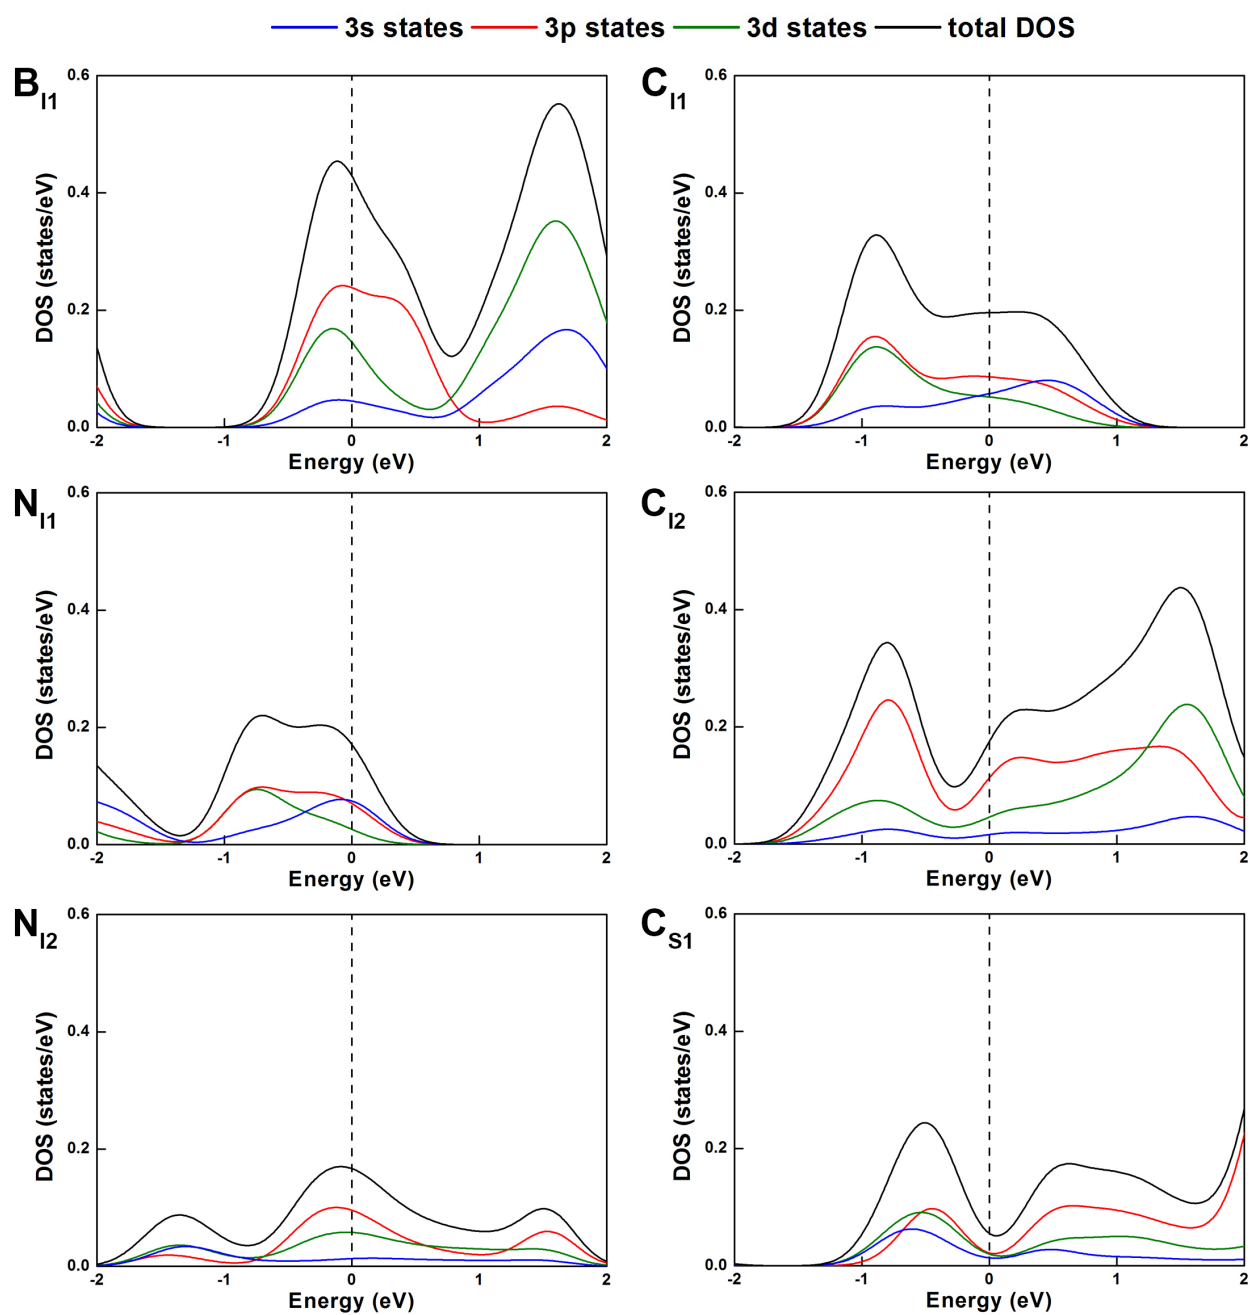

**Figure S5: Total Density of States and Projected State Density only for the magnesium atoms present in the monolayer in the different configurations studied. The vertical dashed line represents the Fermi level.**

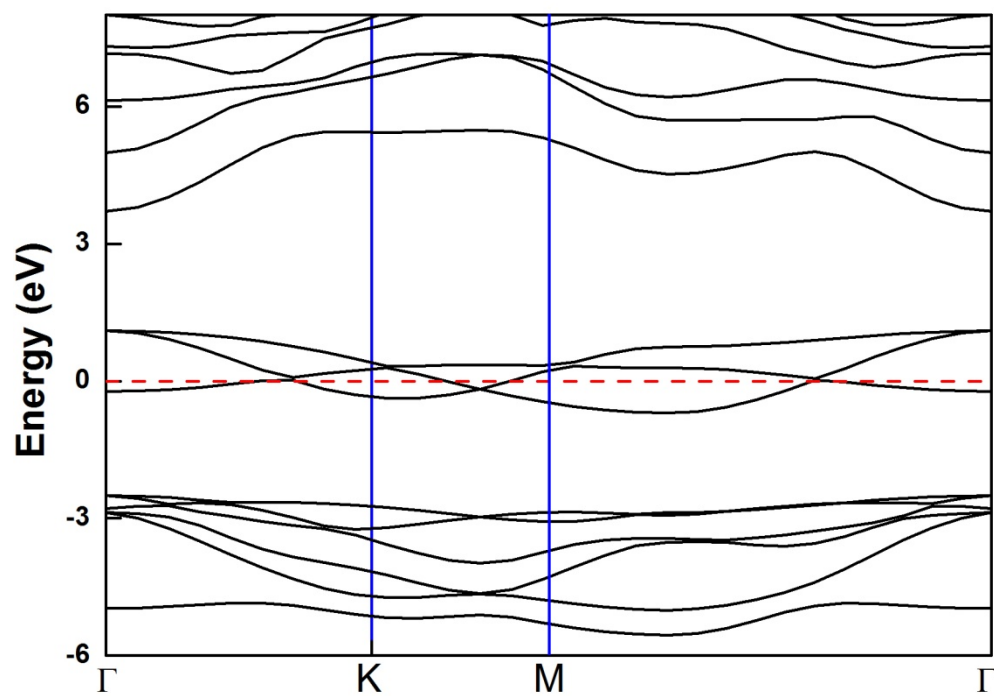

**Figure S6.** Structure of bands of  $\text{MgCl}_2$  monolayer doped with nitrogen atoms in the  $B_{S1}$  configuration. The red dash line represents the Fermi level.



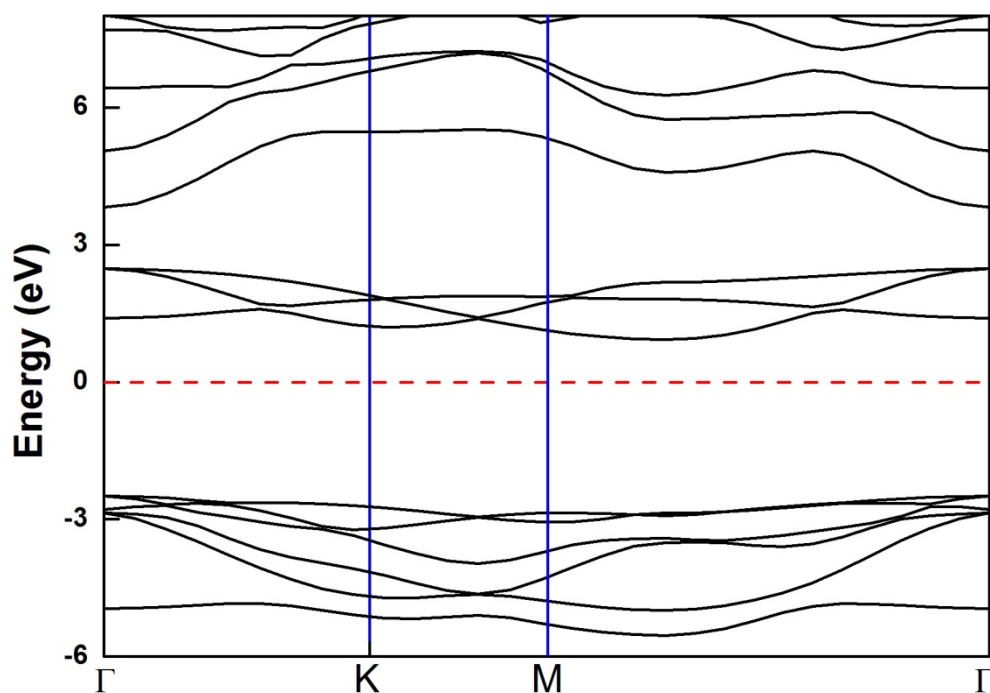

Figure S7. Structure of bands of  $\text{MgCl}_2$  monolayer doped with nitrogen atoms in the  $\text{N}_{\text{S1}}$  configuration. The red dash line represents the Fermi level.

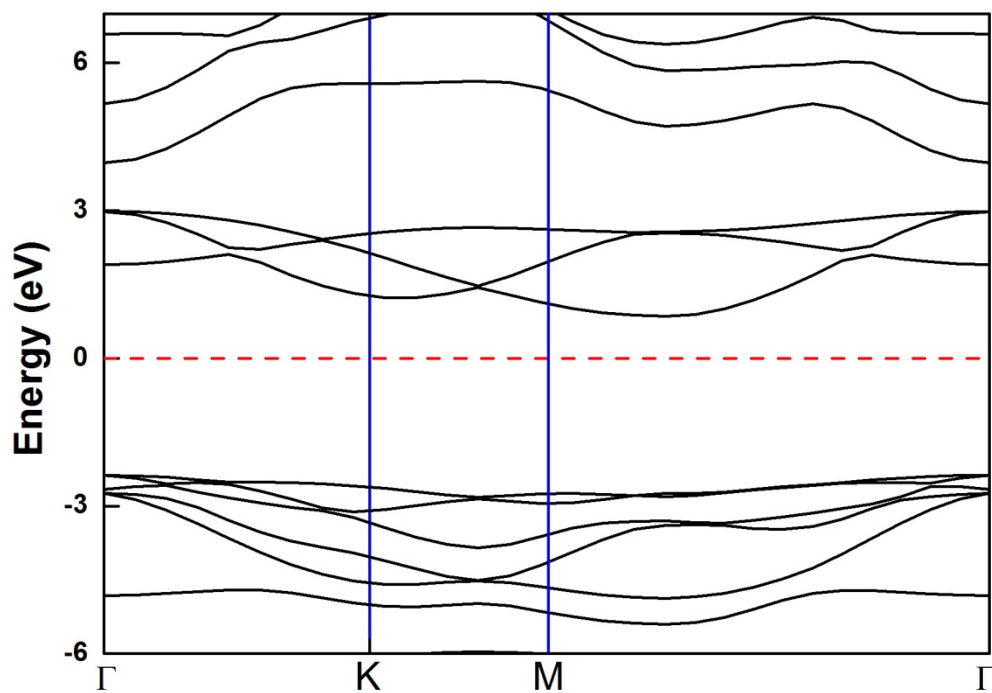

Figure S8. Structure of bands of  $\text{MgCl}_2$  monolayer doped with carbon atoms in the  $\text{C}_{\text{S2}}$  configuration. The red dash line represents the Fermi level.

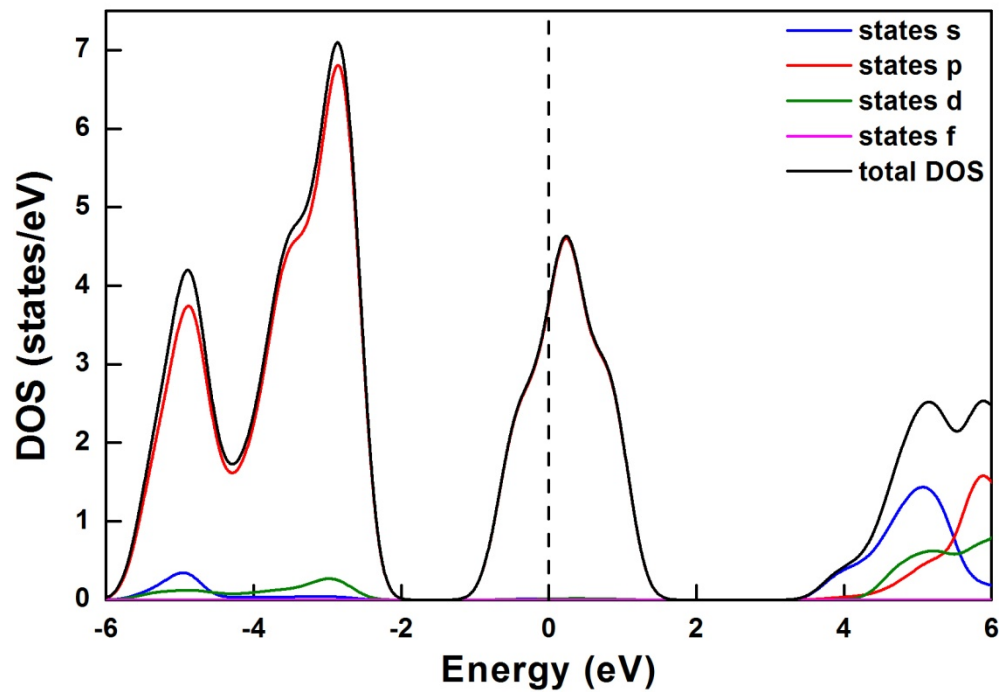

**Figure S9.** Total Density of States and Projected State Density of MgCl<sub>2</sub> monolayer doped with nitrogen atoms in the B<sub>S1</sub> configuration. The vertical dashed line represents the Fermi level.

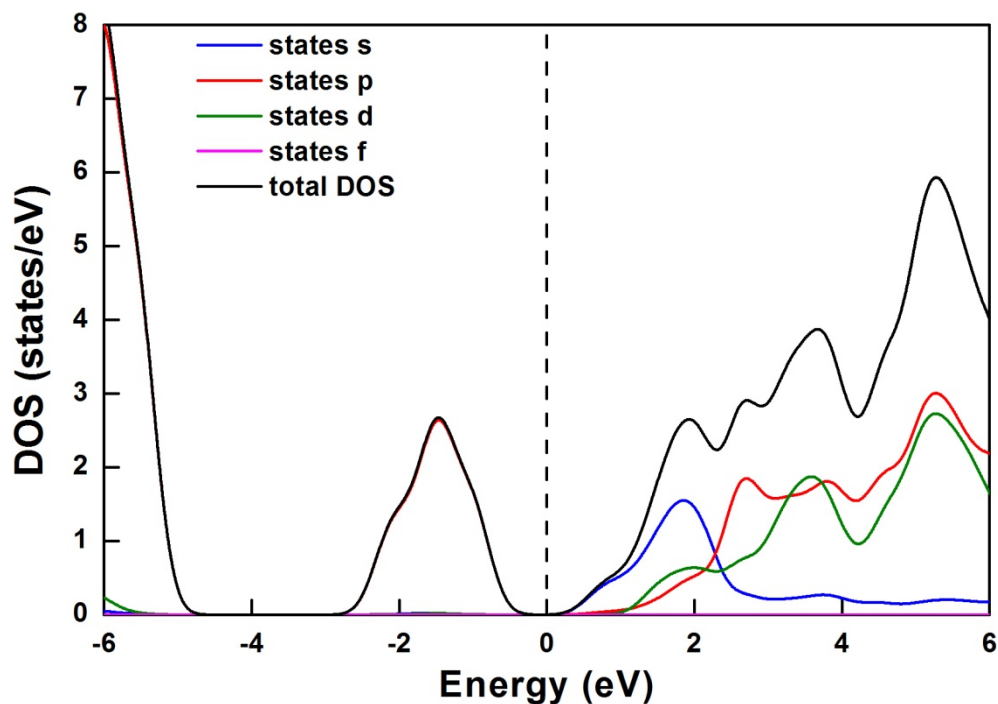

Figure S10. Total Density of States and Projected State Density of  $\text{MgCl}_2$  monolayer doped with nitrogen atoms in the  $\text{N}_{\text{S1}}$  configuration. The vertical dashed line represents the Fermi level.

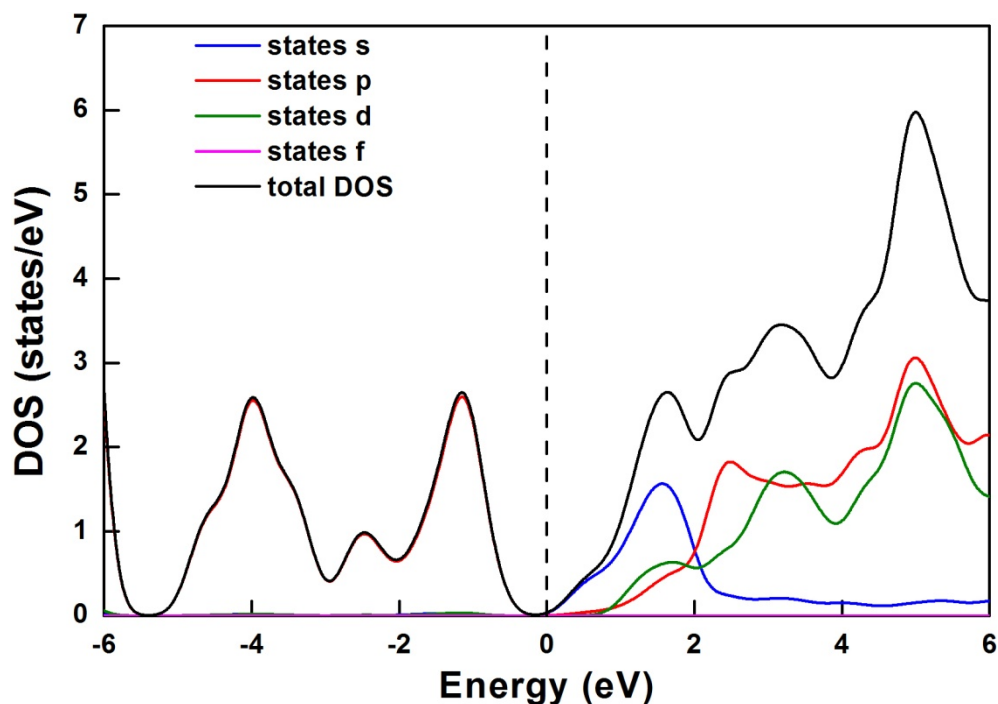

Figure S11. Total Density of States and Projected State Density of  $\text{MgCl}_2$  monolayer doped with carbon atoms in the  $\text{C}_{\text{S2}}$  configuration. The vertical dashed line represents the Fermi level.
